# Supplementary material
Source: HighWire-hosted journal article supplement (https://www.annfammed.org/highwire/filestream/8953/field_highwire_adjunct_files/0/Delacour_Supp_Apps_1-5.pdf)
Supplement: Delacour_Supp_Apps_1-5.pdf [file Delacour_Supp_Apps_1-5.pdf]

## **SUPPLEMENTAL MATERIALS FOR**

Delacour C, Chambe J, Lefebvre F, et al. Association between alcohol consumption and nocturnal leg cramps in patients over 60 years old: a case-control study. *Ann Fam Med*. 2018;16(4):296-301.

## Appendix 1. Medications inducing cramps searched for in the study

### **Anti hypertensive**

---

Thiazides

Angiotensin-Converting Enzyme (ACE) Inhibitors / Angiotensin II Receptor Blockers (ARBs)/ Direct Renin inhibitor (DRI)

Beta-blockers

Calcium Channel Blockers

Loop diuretics

Potassium Spare Diuretics

Central-acting agents

Direct renin inhibitor

### **Lipid-lowering**

---

Statin

Ezetrol

### **Inhaled medication**

---

Beta-mimetics

Anti-leukotriene

### **Other drugs**

---

Bisphosphonates

Anti-epileptic drug

Non-steroidal anti-inflammatory drugs (NSAIDs)

Proton pump inhibitor

Alpha-Blocker

Melatonin

Progestogen

Selective oestrogen receptor modulator

GnRH analogue

Others

## Appendix 2. Medical conditions associated with cramps and searched for in the study

### **Metabolic diseases**

---

Diabetes

Hypothyroidism / hyperthyroidism

Cirrhosis

Hypoparathyroidism / Hyperparathyroidism

Primary adrenal insufficiency (Addison's disease)

Primary aldosteronism (Conn's syndrome)

### **Severe renal insufficiency and hemodialysis**

---

### **Neurologic and psychiatric diseases**

---

Peripheral Neuropathy

Amyotrophic lateral sclerosis

Multiple sclerosis

Parkinson's disease

Restless leg Syndrome

Alcohol addiction

### **Cancer non in remission**

---

### **Cardiovascular diseases**

---

Hypertension

Severe Arteriopathy

Severe Venous insufficiency

### Appendix 3. Beverage consumption explored in the questionnaire

| Non-alcoholic beverage | Alcoholic beverage                             |
|------------------------|------------------------------------------------|
| Water                  | Beer (standard, strong, without alcohol)       |
| Fruit juice            | Cider                                          |
| Sodas                  | Red wine                                       |
| Chicory                | White wine, rosé wine, kir cocktail, champagne |
| Coffee                 | Port, martini, vermouth etc..                  |
| Tea                    | Punch, cocktail                                |
| Herbal Tea             | Whisky, gin, vodka                             |
| Chocolate drink        | Anisette                                       |
| Milk                   | Brandy, rum                                    |
| Milk soja              | Cognac, liquor                                 |
| Soup                   |                                                |

## Appendix 4. Concordance or discordance between cases and controls for the consumption of alcohol

?

|                |                                               | Number | Proportion (%)         |
|----------------|-----------------------------------------------|--------|------------------------|
|                | case and control without alcohol              | 5      | 7.14 [ 2.36 ; 15.89 ]  |
|                | case with alcohol and control without alcohol | 12     | 17.14 [ 9.18 ; 28.03 ] |
| <b>Alcohol</b> | case without alcohol and control with alcohol | 2      | 2.86 [ 0.35 ; 9.94 ]   |
|                | case and control with alcohol                 | 51     | 72.86 [ 60.9 ; 82.8 ]  |
|                | Total                                         | 70     | 100                    |

Legend: this table presents the repartition of the pairs

**Appendix 5. Comparison between study population and reference population by age group and gender**

|                 | <b>Study population<br/>% (n=140)</b> | <b>Reference population<br/>% (n=393796)</b> | <b>P value*</b> |
|-----------------|---------------------------------------|----------------------------------------------|-----------------|
| <b>Agegroup</b> |                                       |                                              |                 |
| 60-64           | 38 (53)                               | 29 (114687)                                  | .02             |
| 65-69           | 27 (38)                               | 19 (75646)                                   | .02             |
| 70-74           | 16 (22)                               | 18 (69321)                                   | .55             |
| 75-79           | 16 (22)                               | 16 (61587)                                   | .98             |
| 80-84           | 2 (3)                                 | 10 (40308)                                   | .002            |
| 85-89           | 1 (2)                                 | 5 (10154)                                    | .05             |
| >90             | 0                                     | 3 (12092)                                    |                 |
| <b>Gender</b>   |                                       |                                              |                 |
| Female          | 57 (80)                               | 44 (172798)                                  | <.01            |
| Male            | 43 (60)                               | 56 (220998)                                  | <.01            |

\*P value were calculated using a Chi2 test
